# Supplementary material for: Characterization and Metabolism Effect of Seed Endophytic Bacteria Associated With Peanut Grown in South China
Source: Front Microbiol. 2019 Nov 13;10:2659. doi: 10.3389/fmicb.2019.02659 (PMC6865467; doi:10.3389/fmicb.2019.02659)
Supplement: Supplementary file 2 [file Table_2.xlsx]

## Sheet: Table2_v1
Fatty acid metabolomics was detected using GC-MS.
						Hexanoate				Octanoate				Dcanoate				Undecaoate				Laurate				Tridecanoate				Myristate				Myristoleate				Pentadecanoate				Pentadecanoate				Palmitate
Smaple	mg	1	2	Y=0.04676x+0.002130		C6:0	3	Y=0.06144x+0.009800		C8:0	4	Y=0.06530x+0.01351		C10:0	5	Y=0.06623x+0.01329		C11:0	6	Y=0.06627x+0.01305		C12:0	7	Y=0.06499x+0.01040		C13:0	8	Y=0.06286x+0.007439		C14:0	9	Y=0.02105x+0.001828		C14:1	10	Y=0.06002x+0.002372		C15:0	11	Y=0.02110x+0.0001830		C15:1	12	Y=0.04866x+0.01812		C16:0	13	Y=0.005242x-0.001037
		Internal	C6:0	Peak area ratio	concentration(μg/mL)	content(μg/g)	C8:0	Peak area ratio	concentration(μg/mL)	content(μg/g)	C10:0	Peak area ratio	concentration(μg/mL)	content(μg/g)	C11:0	Peak area ratio	concentration(μg/mL)	content(μg/g)	C12:0	Peak area ratio	concentration(μg/mL)	content(μg/g)	C13:0	Peak area ratio	concentration(μg/mL)	content(μg/g)	C14:0	Peak area ratio	concentration(μg/mL)	content(μg/g)	C14:1	Peak area ratio	concentration(μg/mL)	content(μg/g)	C15:0	Peak area ratio	concentration(μg/mL)	content(μg/g)	C15:1	Peak area ratio	concentration(μg/mL)	content(μg/g)	C16:0	Peak area ratio	concentration(μg/mL)	content(μg/g)	C16:1	Peak area ratio	concentration(μg/mL)
Contol	11.6	1047035	2867	0.00273821	0.013007	1.1213	2563	0.00244786	-0.119664	-10.3158	2367	0.00226067	-0.172272	-14.851	949	0.000906369	-0.186979	-16.1189	16262	0.0155315	0.037445	3.22801	1791	0.00171054	-0.133705	-11.5263	75596	0.0722001	1.03024	88.814	6960	0.00664734	0.228947	19.7368	28056	0.0267957	0.406925	35.0798	867	0.000828053	0.0305712	2.63545	3294580	3.14658	64.2922	5542.43	9700	0.00926426	1.96514
Contol	12	798518	2801	0.00350775	0.0294642	2.45535	2496	0.00312579	-0.10863	-9.05248	2289	0.00286656	-0.162993	-13.5827	852	0.00106698	-0.184554	-15.3795	15697	0.0196577	0.0997083	8.30902	1734	0.00217152	-0.126611	-10.551	73831	0.09246	1.35255	112.712	7274	0.00910938	0.345909	28.8257	27356	0.0342585	0.531264	44.272	819	0.00102565	0.039936	3.328	3216727	4.02837	82.4137	6867.81	9538	0.0119446	2.47646
Contol	10.2	898160	2804	0.00312194	0.0212134	2.07974	2440	0.00271667	-0.115289	-11.3028	2274	0.00253184	-0.168119	-16.4822	845	0.000940812	-0.186459	-18.2803	15669	0.0174457	0.0663297	6.50291	1717	0.00191169	-0.13061	-12.8049	74058	0.0824552	1.19339	116.999	7103	0.00790839	0.288855	28.3191	27393	0.030499	0.468627	45.9439	912	0.00101541	0.0394507	3.86771	3170991	3.53054	72.1829	7076.76	9561	0.0106451	2.22856
YMR3-T	11.7	979985	5387	0.00549702	0.0720065	6.1544	2082	0.00212452	-0.124926	-10.6775	2421	0.00247045	-0.169059	-14.4495	783	0.000798992	-0.1886	-16.1197	14788	0.01509	0.0307836	2.63107	1596	0.0016286	-0.134965	-11.5355	94251	0.096176	1.41166	120.655	6539	0.00667255	0.230145	19.6705	23423	0.0239014	0.358704	30.6584	803	0.0008194	0.0301612	2.57788	3025564	3.08736	63.0752	5391.04	8901	0.00908279	1.93052
YMR3-T	12	872532	5288	0.00606052	0.0840574	7.00478	2079	0.00238272	-0.120724	-10.0603	2413	0.00276551	-0.16454	-13.7117	790	0.000905411	-0.186994	-15.5828	14837	0.0170045	0.0596731	4.97276	1603	0.00183718	-0.131756	-10.9797	94210	0.107973	1.59933	133.278	7381	0.00845929	0.315026	26.2521	23469	0.0268976	0.408623	34.052	888	0.00101773	0.0395606	3.29671	2989489	3.42622	70.0391	5836.59	9003	0.0103182	2.1662
YMR3-T	12	849867	5264	0.00619391	0.08691	7.2425	2042	0.00240273	-0.120398	-10.0332	2383	0.00280397	-0.163951	-13.6626	773	0.000909554	-0.186931	-15.5776	14618	0.0172003	0.0626277	5.21898	1570	0.00184735	-0.1316	-10.9666	93038	0.109474	1.6232	135.267	6411	0.00754353	0.271522	22.6268	23070	0.0271454	0.412753	34.3961	854	0.00100486	0.0389509	3.2459	2931882	3.44981	70.5239	5876.99	8795	0.0103487	2.17201
MEJA content were detected using GC-MS.
Smaple				Y=0.0976x+0.01130								c
		Internal	MEJA	Peak area ratio	concentration(μg/mL)	content(μg/g)
Contol	10.3	974947	1278	0.00131084	0.00185287	0.179891
Contol	10.3	926677	1154	0.00124531	0.00118145	0.114704
Contol	11.9	858076	1227	0.00142994	0.00307319	0.258251
YMR3-T	11.6	949311	3575	0.00376589	0.0270071	2.32819
YMR3-T	11	944786	3635	0.00384743	0.0278425	2.53114
YMR3-T	9	865605	3558	0.00411042	0.0305371	3.39301
Energy metabolism were detected using High performance liquid phase（HPLC）.
Component Name	HMDB	KEGG	Mode	Tansition	Retention Time (min)	Control	Control	Control	YMR3-T	YMR3-T	YMR3-T
3-phosphoglycerate	HMDB0000807	C00597	Negtive	185.0/97.0	1.25	33895.2	33768.3	33634.2	22919.4	25918.8	23116.7	1677.7	130.518	33765.9	23985	-0.493438	3-phosphoglycerate
Acetyl coenzyme A	HMDB0001206	C00024	Positive	810.1/303.1	13.48	22592.2	29445.1	29056.4	36079.6	46453.3	6708.09	20615.5	3849.25	27031.2	29747	0.138117	Acetyl coenzyme A
Aconitate	HMDB0000072	C00417	Negtive	173.1/85.0	14.67	18333.5	19282.9	20348.5	18305.5	21011	18054.5	1639.3	1008.04	19321.6	19123.7	-0.0148572	Aconitate
Adenosine	HMDB0000050	C00212	Positive	268.1/136.0	4.79	2.2256e+07	2.03828e+07	2.07664e+07	5.44835e+07	5.73566e+07	5.51052e+07	1.51161e+06	989497	2.1135e+07	5.56484e+07	1.3967	Adenosine
Adenosine diphosphate (ADP)	HMDB0001341	C00008	Negtive	426.1/159.0	15.16	32816.2	24413.4	33027.7	23746.1	15555.4	21990.5	4312.36	4913.55	30085.8	20430.7	-0.558345	Adenosine diphosphate (ADP)
ADP-glucose	HMDB0006557	C00498	Negtive	588.0/346.0	13.62	2231.26	2400.64	2757.62	2048.28	2483.4	2355.2	223.593	268.693	2463.17	2295.63	-0.101627	ADP-glucose
a-Ketoglutarate	HMDB0000208	C00026	Negtive	145.0/101.0	11.39	775690	679032	655165	652694	686245	535628	79073.3	63821.4	703296	624855	-0.170609	a-Ketoglutarate
alpha-D-Ribose 5-phosphate	HMDB0001548	C00117	Negtive	229.0/97.0	14.9	30724.3	37716.7	48846.8	28970.1	26545.4	31064.2	2261.42	9139.67	39095.9	28859.9	-0.437952	alpha-D-Ribose 5-phosphate
Adenosine monophosphate (AMP)	HMDB0000045	C00020	Positive	348.1/136.0	13.79	757480	755042	718681	603010	693243	683493	49522	21730.9	743735	659915	-0.172507	Adenosine monophosphate (AMP)
Adenosine triphosphate (ATP)	HMDB0000538	C00002	Positive	508.0/136.2	15.86	238998	259483	236995	106966	97800.7	100048	4776.67	12445.6	245159	101605	-1.27075	Adenosine triphosphate (ATP)
cAMP	HMDB0000058	C00575	Negtive	328.0/134.1	7.7	11076.9	14209.5	14470.1	12164.1	10957.3	9450.28	1359.69	1888.37	13252.2	10857.2	-0.287569	cAMP
Citrate	HMDB0000094	C00158	Negtive	191.1/111.0	15.13	4.99905e+06	3.45224e+06	4.19728e+06	6.40638e+06	6.13102e+06	5.99317e+06	210381	773579	4.21619e+06	6.17685e+06	0.550934	Citrate
D-Fructose 1,6-bisphosphate	HMDB0001058	C00354	Negtive	339.0/97.0	16.52	29447.3	24431.8	28161.7	18805.9	23679.6	12722.3	5489.78	2605.11	27346.9	18402.6	-0.571471	D-Fructose 1,6-bisphosphate
D-Glucose 1-phosphate	HMDB0001586	C00103	Negtive	259.0/241.0	14.63	87116.4	67088.4	391583	224054	248034	212233	18241.4	181841	181929	228107	0.326334	D-Glucose 1-phosphate
D-Glucose 6-phosphate	HMDB0001401	C00668	Negtive	259.0/199.0	15.31	628665	595847	662093	706423	672093	704270	19228.8	33123.5	628868	694262	0.142723	D-Glucose 6-phosphate
Flavin mononucleotide (FMN)	HMDB0001520	C00061	Positive	457.1/359.1	13.25	23588.5	19414.3	31704	19173.5	21532.3	20495.7	1182.29	6249.28	24902.2	20400.5	-0.287674	Flavin mononucleotide (FMN)
Fumarate	HMDB0000134	C00122	Negtive	115.0/71.0	12.41	371739	321742	409488	499608	469715	355835	75865.1	44015	367656	441719	0.264772	Fumarate
Guanosine diphosphate (GDP)	HMDB0001201	C00035	Positive	444.0/152.1	15.99	36767.5	29342.1	31279.3	19572	23348.4	4357.99	10052.9	3851.61	32463	15759.5	-1.04258	Guanosine diphosphate (GDP)
L-Glutamate	HMDB0000148	C00025	Positive	148.1/84.1	12.32	1.34437e+07	1.60661e+07	2.04795e+07	1.27907e+07	1.47895e+07	1.11848e+07	1.80592e+06	3.55568e+06	1.66631e+07	1.29217e+07	-0.366866	L-Glutamate
Inosine 5'-monophosphate (IMP)	HMDB0000175	C00130	Positive	349.1/137.0	13.77	62259.5	58193.1	57000.3	42227.3	51176.7	50305.1	4934.61	2757.34	59150.9	47903	-0.304285	Inosine 5'-monophosphate (IMP)
Isocitrate	HMDB0000193	C00311	Negtive	191.0/117.0	14.65	68077.3	63731.2	70501.3	78858.7	88544.3	94471	7881.17	3430.19	67436.6	87291.3	0.372306	Isocitrate
L-Lactate	HMDB0000190	C00186	Negtive	89.0/43.2	5.64	191556	168622	173886	398448	206142	278803	97105.2	12013.4	178021	294464	0.726043	L-Lactate
L-Malate	HMDB0000156	C00149	Negtive	133.0/115.0	12.53	6.56582e+06	6.47245e+06	6.73251e+06	8.53727e+06	8.15778e+06	7.55899e+06	493217	131744	6.59026e+06	8.08468e+06	0.294855	L-Malate
NAD	HMDB0000902	C00003	Positive	664.1/428.0	13.81	213797	284830	303880	234087	296874	164192	66372.4	47475.3	267503	231718	-0.207185	NAD
NADP	HMDB0000217	C00006	Positive	744.1/136.0	15.91	162902	134251	175888	194404	177185	190822	9085.48	21303.9	157680	187470	0.249661	NADP
Oxaloacetate	HMDB0000223	C00036	Negtive	131.0/87.0	6.26	216889	178233	279456	231196	266277	222723	23092.2	51079.8	224859	240066	0.0944053	Oxaloacetate
Phosphoenolpyruvate	HMDB0000263	C00074	Negtive	167.0/79.0	14.67	18863.1	10355.7	17877.3	17803.9	21011.2	18243.3	1738.86	4653.38	15698.7	19019.5	0.276833	Phosphoenolpyruvate
Pyruvate	HMDB0000243	C00022	Negtive	87.0/43.0	2.65	32309.9	27753.8	34665.9	33259.2	38583.8	33883.9	2910.63	3513.91	31576.5	35242.3	0.158455	Pyruvate
Succinate	HMDB0000254	C00042	Negtive	117.0/73.0	10.55	42919.7	44859	42245	193256	205885	2.07319e+06	1.08175e+06	1356.99	43341.3	824109	4.24902	Succinate
Thiamine monophosphate (TMP)	HMDB0002666	C01081	Positive	345.1/122.1	16.73	29705.2	18907.2	25480.6	20961.2	22948.3	30467.4	5014.18	5441.41	24697.7	24792.3	0.00551716	Thiamine monophosphate (TMP)
Thiamine pyrophosphate (TPP)	HMDB0001372	C00068	Positive	425.1/122.0	16.63	6110.41	6276.21	6760.11	4856.09	4183.63	4327.75	354.053	337.578	6382.24	4455.82	-0.518371	Thiamine pyrophosphate (TPP)
UDP-glucose	HMDB0000286	C00029	Negtive	565.0/323.0	13.97	2.59148e+06	1.82381e+06	2.49561e+06	1.91878e+06	2.32335e+06	2.32593e+06	234328	418299	2.30363e+06	2.18935e+06	-0.0734084	UDP-glucose
[truncated: 89 more columns]
